# Supplementary material
Source: PubMed Central journal article supplement (PMC6949574)
Supplement: ijcep0012-2801-f5.pdf [file ijcep0012-2801-f5.pdf]

OVOL1 represses OSCC by targeting ZEB1

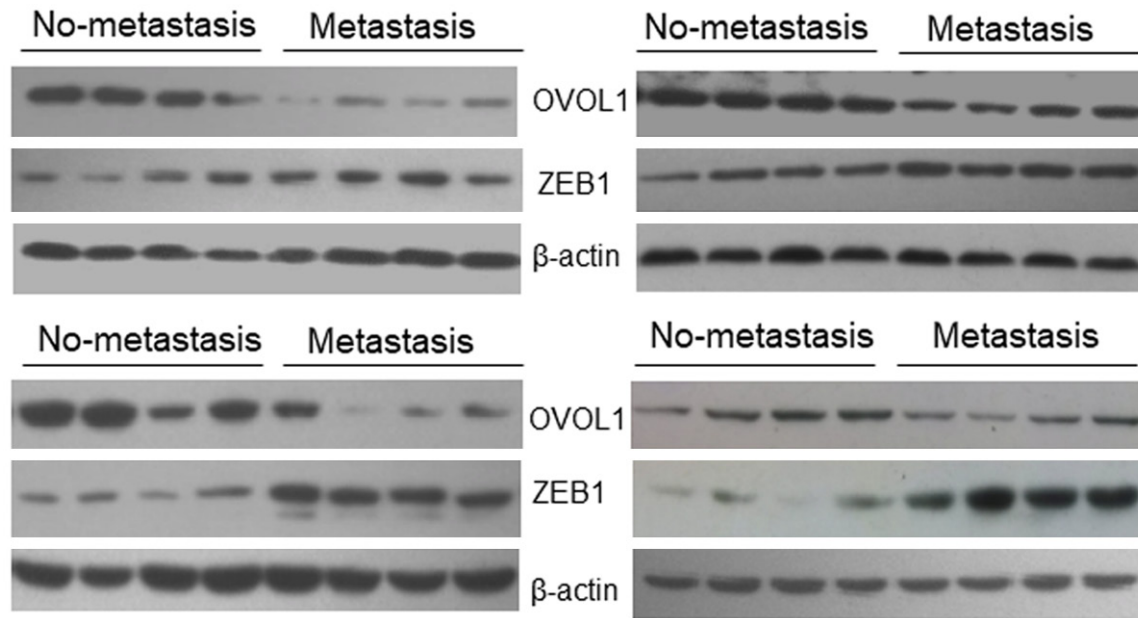

**Figure S1.** The level of OVOL1 and ZEB1 of 32 collected clinical samples from 32 OSCC patients (16 non-metastasis and 16 lymph node metastasis). The level of OVOL1 is reduced significantly with  $P < 0.001$  and power  $> 0.9$ .
